# Supplementary material
Source: ML conference proceedings conference paper supplement (https://openaccess.thecvf.com/content/CVPR_2019/html/Lu_Unsupervised_Domain-Specific_Deblurring_CVPR_2019_paper.html)
Supplement: Supplementary file 1 [file Lu_Unsupervised_Domain-Specific_Deblurring_CVPR_2019_supplemental.pdf]

# Supplementary Materials - Unsupervised Domain-Specific Deblurring via Disentangled Representations

Boyuan Lu Jun-Cheng Chen Rama Chellappa  
UMIACS, University of Maryland, College Park

bylu@umiacs.umd.edu pullpull@cs.umd.edu rama@umiacs.umd.edu

In this document, we provide additional materials to supplement our main submission. In the first section, we provide further details on how we choose the weight  $\lambda_p$  for the perceptual loss. In the second section, we provide some additional visual results for face and text deblurring experiments. Finally, we show some natural image examples of the proposed method, and some failure cases.

## 1. Parameter selection for $\lambda_p$

As we mentioned in the main submission, the weight for perceptual loss  $\lambda_p$  needs to be tuned so that the deblurred image neither stays too close to the original blurred image, nor contains many artifacts. The quantitative performance and qualitative visualizations are shown in Table 1 and Fig. 1 respectively. If setting the  $\lambda_p$  too high ( $\lambda_p = 1$ ), the deblurred images become very blurred (Fig. 4(b)), and both the quantitative performance and visualization results are poor. In contrast, if  $\lambda_p$  is set too low ( $\lambda_p = 0.01$ ), the deblurred images contain many artifacts (Fig. 1(d)).

## 2. Additional visual results

As shown in Fig. 2 and Fig. 3, we present some additional deblurred results for real-world blurred face and text images.

| Values             | PSNR         | SSIM        | $d_{VGG}$   |
|--------------------|--------------|-------------|-------------|
| $\lambda_p = 1$    | 18.40        | 0.59        | 78.0        |
| $\lambda_p = 0.1$  | <b>20.81</b> | <b>0.65</b> | <b>57.6</b> |
| $\lambda_p = 0.01$ | 20.21        | 0.62        | 58.7        |

Table 1. Quantitative results for different settings of  $\lambda_p$ .

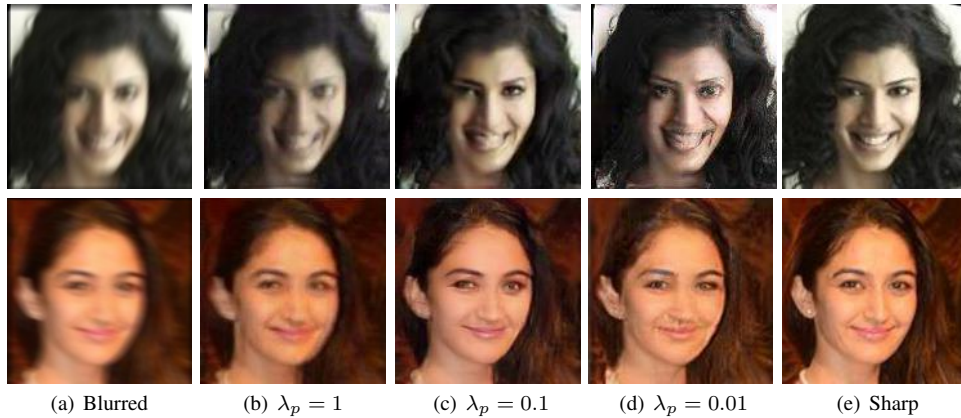

Figure 1. Visualizations of sample images with different settings of  $\lambda_p$ . Best viewed by zooming in.

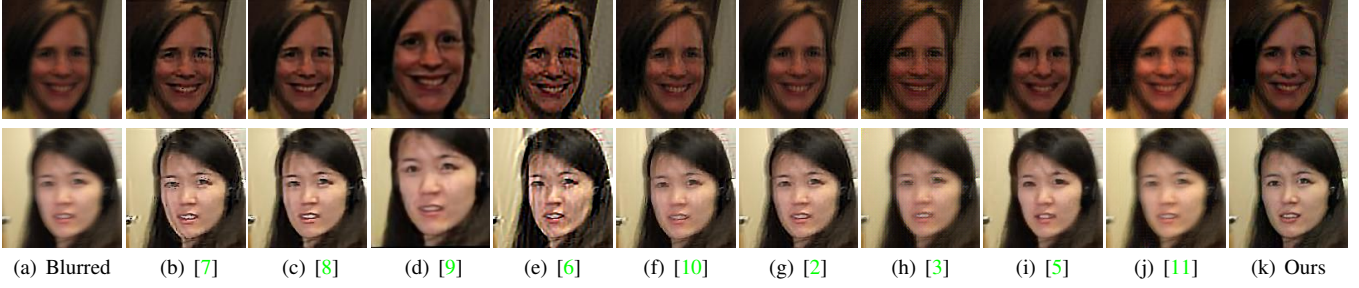

Figure 2. Visual comparisons with state-of-the-art methods on real blurred face images. Best viewed by zooming in.

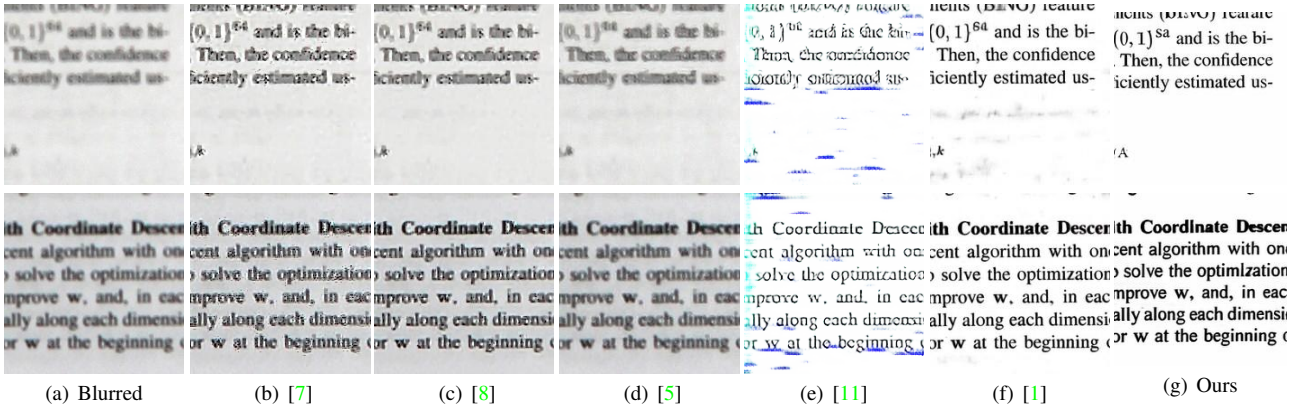

Figure 3. Visual comparisons with state-of-the-art methods on real blurred text images. Best viewed by zooming in.

### 3. Results for COCO dataset

We also tried the proposed method for natural image deblurring. Specifically, we split the COCO dataset [4] into three mutually exclusive sets: sharp set, blurred set and test set. Images in blurred set and test set are blurred in the same way as the CelebA dataset in the main submission, and we use the same framework to train the deblurred model. As shown in Fig. 4, the proposed method can recover the global structures of the latent sharp images. In the given two examples, the red bus and the pizzas become sharper after deblurring. However, if zooming into some local details, we find the results are far from perfect. For example, the characters and headlights on the red bus are not restored that well; the face in the second image contain many artifacts. Meanwhile, the color of the red bus is also distorted.

### References

- [1] M. Hradi, J. Kotera, P. Zemk, and F. roubek. Convolutional neural networks for direct text deblurring. In M. W. J. Xianghua Xie and G. K. L. Tam, editors, *Proceedings of the British Machine Vision Conference (BMVC)*, pages 6.1–6.13. BMVA Press, September 2015. 2
- [2] D. Krishnan, T. Tay, and R. Fergus. Blind deconvolution using a normalized sparsity measure. In *Proceedings of the IEEE Conference on Computer Vision and Pattern Recognition (CVPR)*, pages 233–240. IEEE, 2011. 2
- [3] O. Kupyn, V. Budzan, M. Mykhailych, D. Mishkin, and J. Matas. Deblurgan: Blind motion deblurring using conditional adversarial networks. In *Proceedings of the IEEE Conference on Computer Vision and Pattern Recognition (CVPR)*, 2018. 2
- [4] T.-Y. Lin, M. Maire, S. Belongie, J. Hays, P. Perona, D. Ramanan, P. Dollár, and C. L. Zitnick. Microsoft coco: Common objects in context. In *Proceedings of the European Conference on Computer Vision (ECCV)*, pages 740–755. Springer, 2014. 2
- [5] S. Nah, T. Hyun Kim, and K. Mu Lee. Deep multi-scale convolutional neural network for dynamic scene deblurring. In *Proceedings of the IEEE Conference on Computer Vision and Pattern Recognition (CVPR)*, pages 3883–3891, 2017. 2
- [6] J. Pan, Z. Hu, Z. Su, and M.-H. Yang. Deblurring face images with exemplars. In *Proceedings of the European Conference on Computer Vision (ECCV)*, pages 47–62. Springer, 2014. 2
- [7] J. Pan, Z. Hu, Z. Su, and M.-H. Yang. Deblurring text images via l0-regularized intensity and gradient prior. In *Proceedings of the IEEE Conference on Computer Vision and Pattern Recognition (CVPR)*, pages 2901–2908, 2014. 2



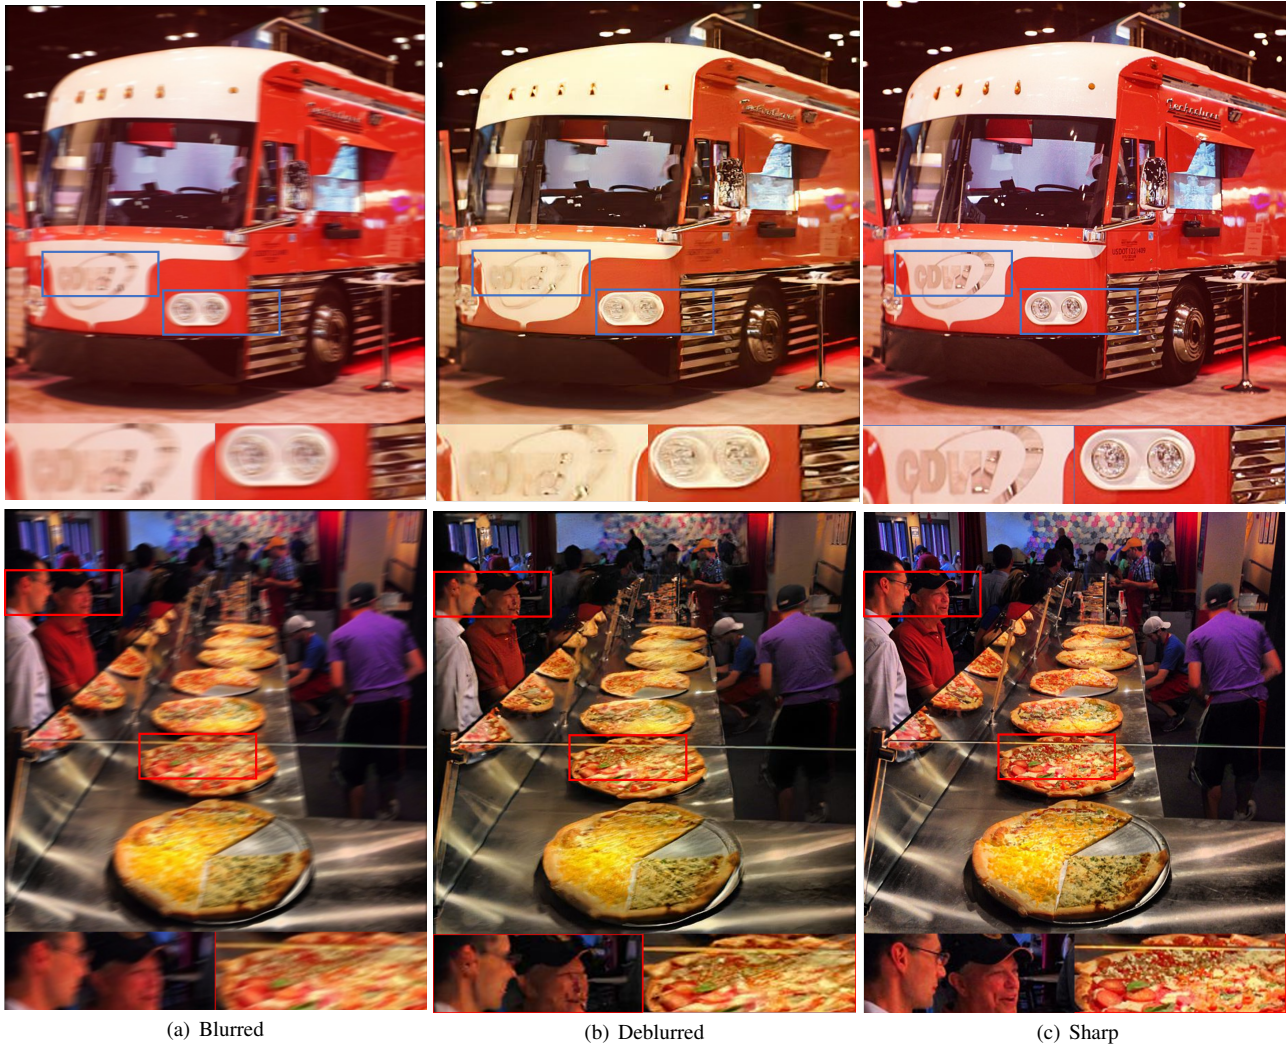

Figure 4. Visualizations of sample images for COCO dataset. Best view by zooming in.

- [8] J. Pan, D. Sun, H. Pfister, and M.-H. Yang. Blind image deblurring using dark channel prior. In *Proceedings of the IEEE Conference on Computer Vision and Pattern Recognition (CVPR)*, pages 1628–1636, 2016. 2
- [9] Z. Shen, W.-S. Lai, T. Xu, J. Kautz, and M.-H. Yang. Deep semantic face deblurring. In *Proceedings of the IEEE Conference on Computer Vision and Pattern Recognition (CVPR)*, 2018. 2
- [10] L. Xu, S. Zheng, and J. Jia. Unnatural l0 sparse representation for natural image deblurring. In *Proceedings of the IEEE conference on computer vision and pattern recognition (CVPR)*, pages 1107–1114, 2013. 2
- [11] J.-Y. Zhu, T. Park, P. Isola, and A. A. Efros. Unpaired image-to-image translation using cycle-consistent adversarial networks. In *Proceedings of International Conference on Computer Vision (ICCV)*, 2017. 2
